# Supplementary material for: Doenjang Ameliorates Diet-Induced Hyperlipidemia and Hepatic Oxidative Damage by Improving Lipid Metabolism, Oxidative Stress, and Inflammation in ICR Mice
Source: MDPI journal article supplement (doi:10.3390/foods13101471), 2024-05-10
Supplement: s1 [file s1]

## SUPPLEMENTARY TABLES

**Table S1: Diet composition**

|                    | ND       | HD       | DS       |
|--------------------|----------|----------|----------|
| casein             | 117.5    | 117.5    | 105.7163 |
| L-Cystine          | 2.75     | 2.75     | 2.75     |
| corn starch        | 315      | 106      | 91.87596 |
| maltodextrin 10    | 50       | 50       | 50       |
| Sucrose            | 50       | 50       | 50       |
| lard               | 16.5     | 110      | 107.6085 |
| soybean oil        | 10       | 10       | 10       |
| Cholesterol        | 0        | 1        | 1        |
| Cellulose          | 25       | 25       | 25       |
| mineral mix        | 17.5     | 17.5     | 17.5     |
| Calcium Carbonate  | 15       | 15       | 15       |
| Vitamin Mix        | 5        | 5        | 5        |
| Choline bitartrate | 1.25     | 1.25     | 1.25     |
| 된장                 | 0        | 0        | 102.2    |
| total(g)           | 625.5    | 511      | 584.9008 |
| kcal               | 4759     | 4770     | 4770     |
| kcal/g             | 3.804157 | 4.667319 | 4.667319 |

Note: The carbohydrate, protein and fat content of the Doenjang sample was taken into consideration during formulation and were adjusted accordingly to result in similar ratio of all macronutrients.

**Table S2: Primer sequence**

| Gene name | Primer sequence (5'→3')            |
|-----------|------------------------------------|
| β-actin   | f- AGC CTT CCT TCT TGG GTA TGG     |
|           | r- AGC CTT CCT TCT TGG GTA TGG     |
| CPT-1     | f- AAA GAT CAA TCG GAC CCT AGA CA  |
|           | r- CAG CGA GTA GCG CAT AGT CA      |
| PPARα     | f- GGA TGT CAC ACA ATG CAA TTC GCT |
|           | r- TCA CAG AAC GGC TTC CTC AGG TT  |
| PPARγ     | f- GAT CAA AGA GGA GCC AGT GC      |
|           | r- GGC CAG CAT CGT GTA GAT GA      |
| SOD       | f- CAG GAC CTC ATT TTA ATC CTC AC  |
|           | r- TGC CCA GGT CTC CAA CAT         |
| CAT       | f- CCT TCA AGT TGG TTA ATG CAG A   |
|           | r- CAA GTT TTT GAT GCC CTG GT      |
| NRF2      | f- GCC TCC AAA GGA TGT CAA TCA     |
|           | r- GCC TCA CCT CTG CTG CAA GTA     |
| GPx1      | f- TTT CCC GTG CAA TCA GTT C       |
|           | r- TCG GAC GTA CTT GAG GGA AT      |
| SREBP-1c  | f- GAT CAA AGA GGA GCC AGT GC      |
|           | r- TAG ATG GTG GCT GCT GAG TG      |
| FAS       | f- AGG GGT CGA CCT GGT CCT CA      |
|           | r- GCC ATG CCC AGA GGG TGG TT      |
| ACC       | f- CCA ACA TGA GGA CTA TAA CTT CCT |
|           | r- TAC ATA CGT GCC GTC AGG CTT CAC |
| NF-kB     | f- GCT GCC AAA GAA GGA CAC GAC A   |
|           | r- GGC AGG CTA TTG CTC ATC ACA G   |
| IL6       | f- TAC CAC TTC ACA AGT CGG AGG C   |
|           | r- CTG CAA GTG CAT CAT CGT TGT TC  |
| hmgcr     | f- GCT CGT CTA CAG AAA CTC CAC G   |
|           | r- GCT TCA GCA GTG CTT TCT CCG T   |
| LXR       | f- GTT ATA ACC GGG AAG ACT TTG C   |
|           | r- AAA CTC GGC ATC ATT GAG TTG     |
| Glut4     | f- GTA ACT TCA TTG TCG GCA TGG     |
|           | r- AGC TGA GAT CTG GTC AAA CG      |
| PGC-1α    | f- GAA TCA AGC CAC TAC AGA CAC CG  |
|           | r- CAT CCC TCT TGA GCC TTT CGT G   |
| G6P       | f- GAC CAA GAA GCC TGG CAT GTT C   |
|           | r- AGA CAT CCA GGA TGA GGC GTT C   |
